# Supplementary material for: High NaCl Concentrations in Water Are Associated with Developmental Abnormalities and Altered Gene Expression in Zebrafish
Source: MDPI journal article supplement (doi:10.3390/ijms25074104), 2024-04-07
Supplement: s1 [file s1]

|                  | NaCl          | KCl            | CaCl <sub>2</sub> | MgSO <sub>4</sub> |
|------------------|---------------|----------------|-------------------|-------------------|
| <b>E3</b>        | <b>5 mM</b>   | <b>0.17 mM</b> | <b>0.33 mM</b>    | <b>0.33 mM</b>    |
| <b>5X NaCl</b>   | <b>25 mM</b>  | 0.17 mM        | 0.33 mM           | 0.33 mM           |
| <b>10X NaCl</b>  | <b>50 mM</b>  | 0.17 mM        | 0.33 mM           | 0.33 mM           |
| <b>50X NaCl</b>  | <b>250 mM</b> | 0.17 mM        | 0.33 mM           | 0.33 mM           |
| <b>100X NaCl</b> | <b>500 mM</b> | 0.17 mM        | 0.33 mM           | 0.33 mM           |
| <b>5X KCl</b>    | 5 mM          | <b>0.85 mM</b> | 0.33 mM           | 0.33 mM           |
| <b>10X KCl</b>   | 5 mM          | <b>1.7 mM</b>  | 0.33 mM           | 0.33 mM           |
| <b>50X KCl</b>   | 5 mM          | <b>8.5 mM</b>  | 0.33 mM           | 0.33 mM           |
| <b>100X KCl</b>  | 5 mM          | <b>17 mM</b>   | 0.33 mM           | 0.33 mM           |
| <b>5X</b>        | 5 mM          | 0.17 mM        | <b>1.65 mM</b>    | 0.33 mM           |
| <b>10X</b>       | 5 mM          | 0.17 mM        | <b>3.3 mM</b>     | 0.33 mM           |
| <b>50X</b>       | 5 mM          | 0.17 mM        | <b>16.5 mM</b>    | 0.33 mM           |
| <b>100X</b>      | 5 mM          | 0.17 mM        | <b>33 mM</b>      | 0.33 mM           |
| <b>5X</b>        | 5 mM          | 0.17 mM        | 0.33 mM           | <b>1.65 mM</b>    |
| <b>10X</b>       | 5 mM          | 0.17 mM        | 0.33 mM           | <b>3.3 mM</b>     |
| <b>50X</b>       | 5 mM          | 0.17 mM        | 0.33 mM           | <b>16.5 mM</b>    |
| <b>100X</b>      | 5 mM          | 0.17 mM        | 0.33 mM           | <b>33 mM</b>      |

Supplemental Table S1. Salt concentration used for treatments.

|       | Forward primer       | Reverse primer       | Product size |
|-------|----------------------|----------------------|--------------|
| Shh   | CACCTCTCGCCTACAAGCAG | GCTCTTCCCTCGTAGTGGAG | 315          |
| Ptc1  | TCAGTGAAGCGCATGAACGC | GTCGCTAAGCTTTGAAACCA | 130          |
| Actin | TACAATGAGCTCCGTGTTGC | CACCATCACCAGAGTCCAGC | 205          |

Supplemental Table S2. Sequences of primers used in qPCR reactions.
